# Supplementary material
Source: publisher site journal article supplement (https://www.dovepress.com/article/571825)
Supplement: Supplementary file 1 [file 571825%20Supplementary%20Material.docx]

**Supplementary Table S1:** Diagnostic specificity and species identification results of the Nanopore tNGS DR-TB assay among non-tuberculous mycobacteria (NTM) and mycobacteria-negative clinical control samples.

| **Sample Category / Species** | **N** | **Reference Result  (Anyplex™ MTB/NTM)** | **tNGS Result** | **%Concordance** |
| --- | --- | --- | --- | --- |
| **Non-tuberculous mycobacteria (NTM)** |  |  |  |  |
| Mycobacterium abscessus | 2 | NTM positive, *M. abscessus*** | *M. abscessus* | 100% |
| Mycobacterium iranicum | 1 | NTM positive | *M. iranicum* | 100% |
| Unidentified NTM species | 7 | NTM positive  (Genus level) | Unidentified/ Low reads* | N/A*** |
|  |  |  |  |  |
|  |  |  |  |  |
| **Mycobacteria-negative controls (true negative control)** | 10 | Negative for MTB and NTM | Negative | 100% |
|  |  |  |  |  |
| **Total** | **20** |  |  | **100% Specificity** |

**Notes:** * indicates tNGS sequencing yielded insufficient data for identification due to low bacterial load (Ct values >35 or smear-negative). ** indicates the species-level was confirm using LPA. *** indicates concordance was not applicable (N/A). However, both methods agreed on the absence of *M. tuberculosis*.

Supplementary Table S2: Detailed genotypic (gDST) and phenotypic (pDST) drug susceptibility results for the 59 clinical isolates included in the diagnostic assessment.

**Abbreviations:** gDST, genotypic drug susceptibility testing; pDST, phenotypic drug susceptibility testing; RAVs, resistance-associated variants. Sample types: SPT, sputum sample; CLN, culture isolate. Patient Categories: PS, pan-susceptible; IR, isoniazid-resistant; RR, rifampicin-resistant; MDR, multidrug-resistant; pre-XDR, pre-extensively drug-resistant. Drugs & Phenotypes: INH, isoniazid; RIF, rifampicin; EMB, ethambutol; PZA, pyrazinamide; STM, streptomycin; AMK, amikacin; KAN, kanamycin; ETO, ethionamide; FQs, fluoroquinolones; -R, resistant (e.g., RIF-R); -S, susceptible; ND, not determined/done.

**Supplementary Figure S1** Nanopore tNGS TB-DR Custom Panel results for the 59 samples. The reports were retrieved from the EPI2ME Lab software (wf-tb-amr workflow), showing species identification, spoligotyping, lineage, and drug resistance profiles for each sample.

**TB-SPT**

**
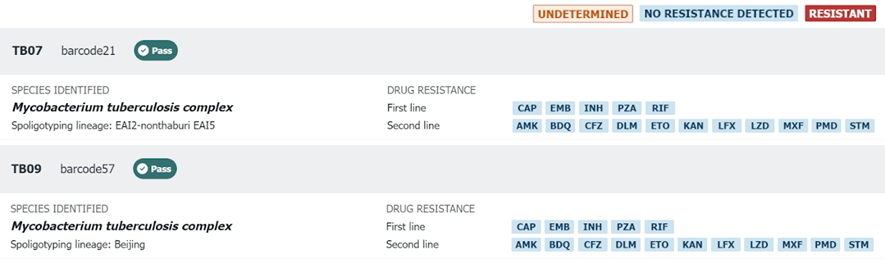
**

**
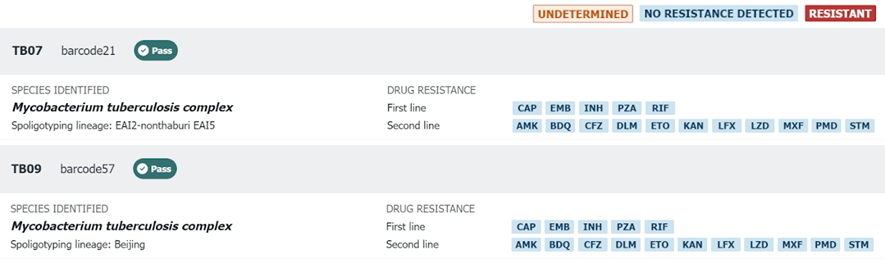
**

**IR**

**
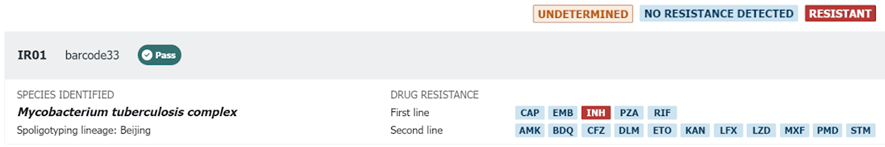
**

**
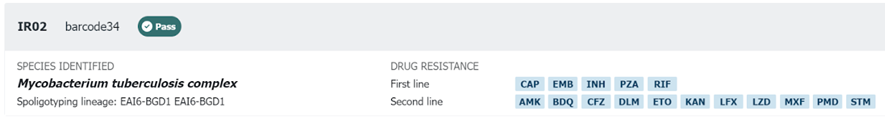
**

**
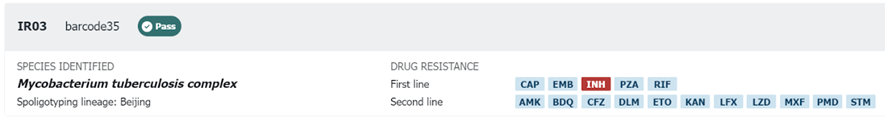
**

**
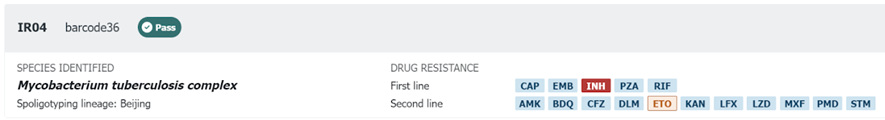
**

**
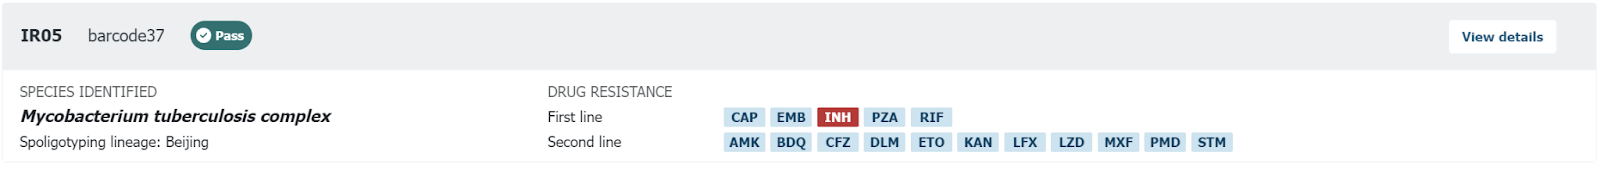
**

**
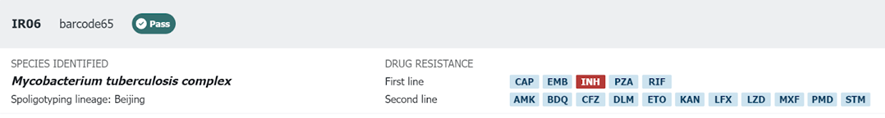
**

**
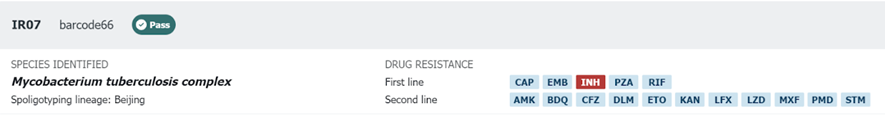
**

**
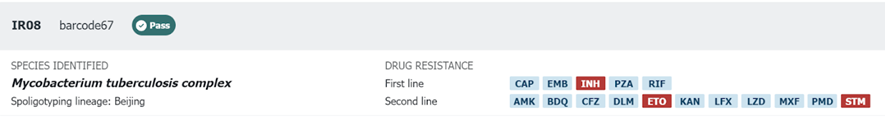
**

**
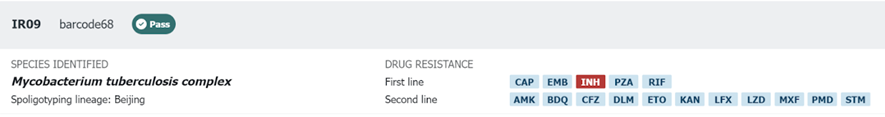
**

**
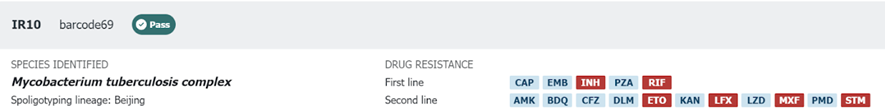
**

**RR**

**
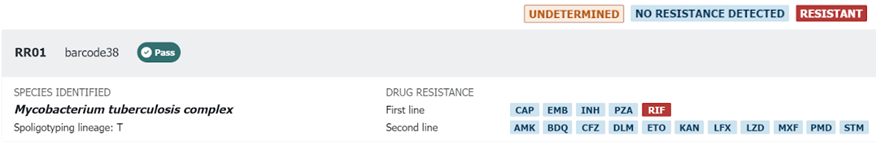
**

**
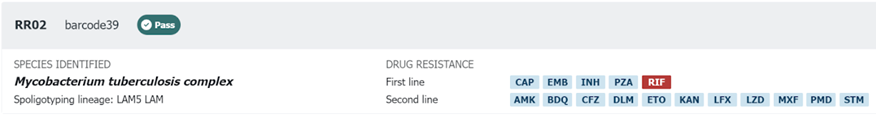
**

**
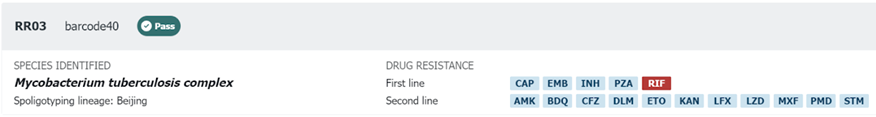
**

**
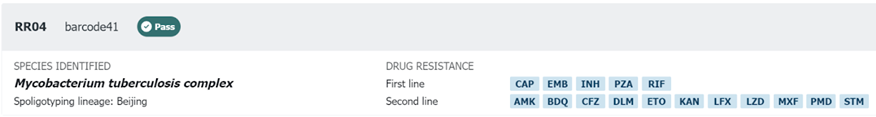
**

**
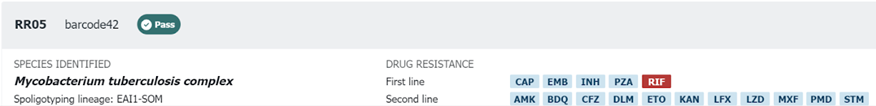
**

**
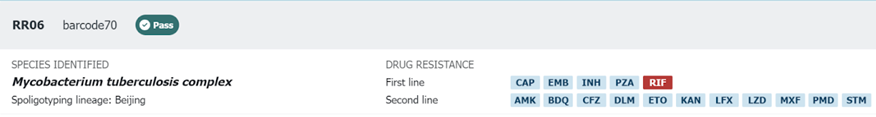
**

**
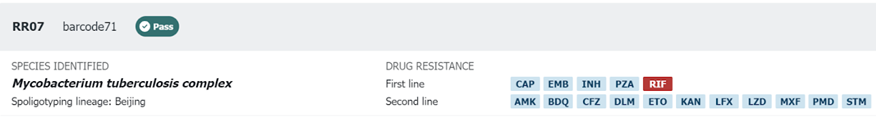
**

**
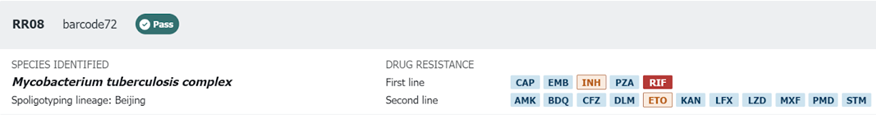
**

**
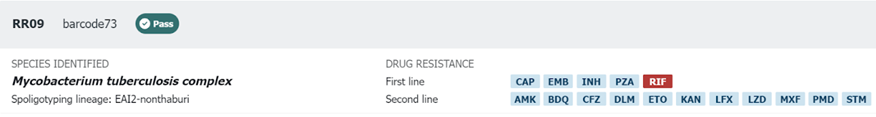
**

**
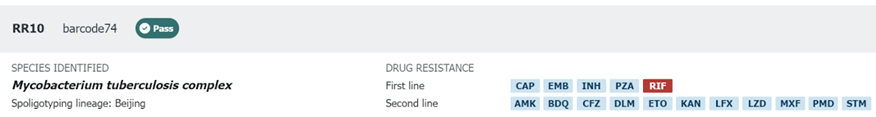
**

**
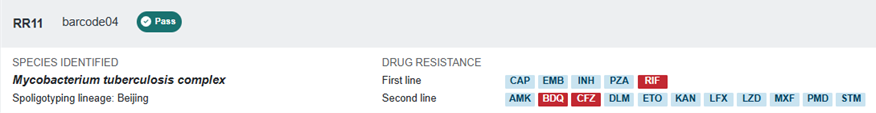
**

**IRR/MDR**

**
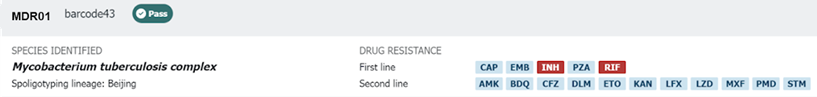
**

**
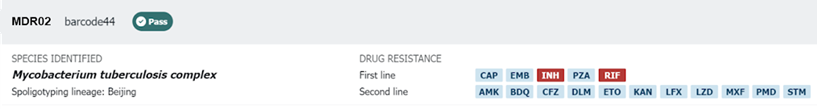
**

**
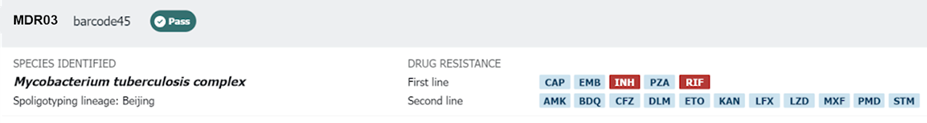
**

**
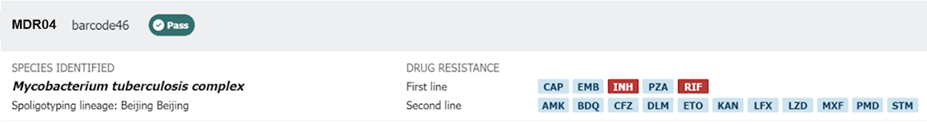
**

**
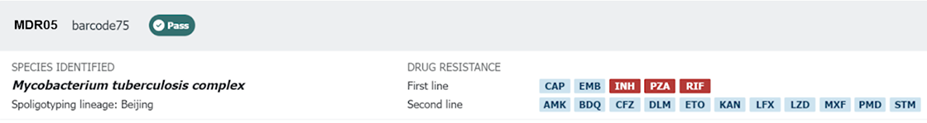
**

**
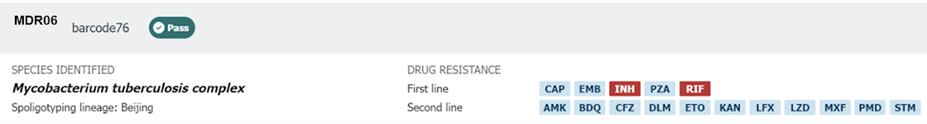
**

**
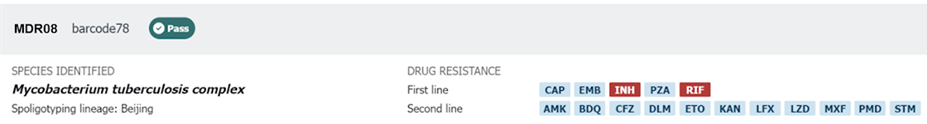
**

**
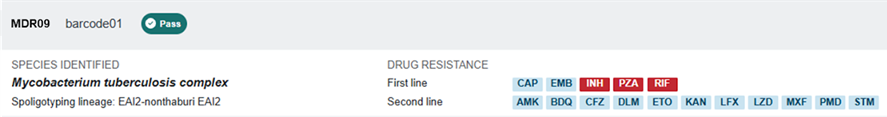
**

**
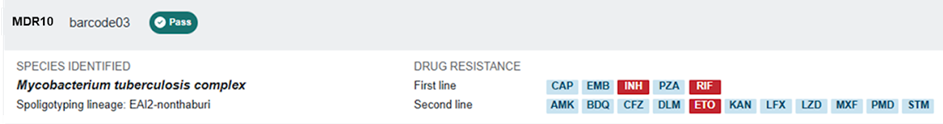
**

**
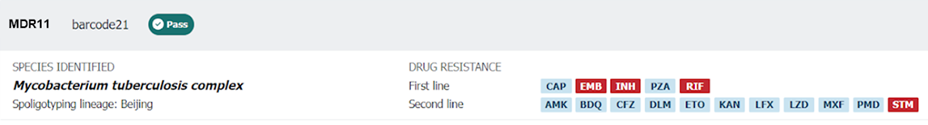
**

**
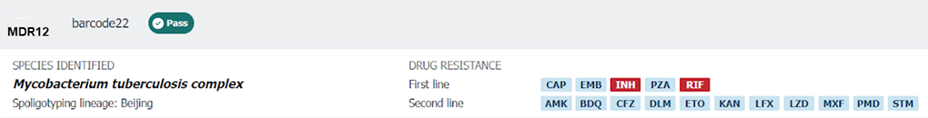
**

**
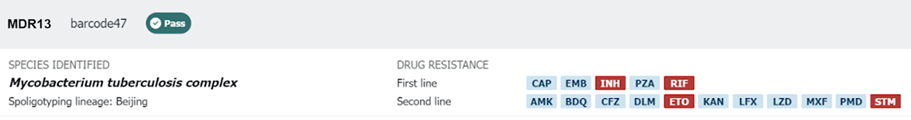
**

**
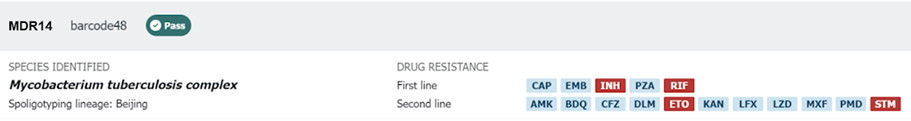
**

**
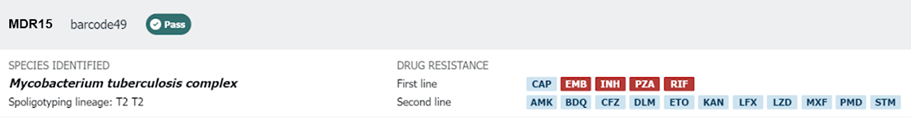
**

**
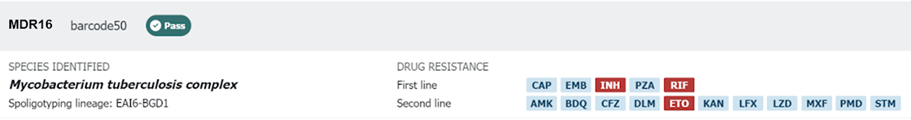
**

**Pre-XDR**

**
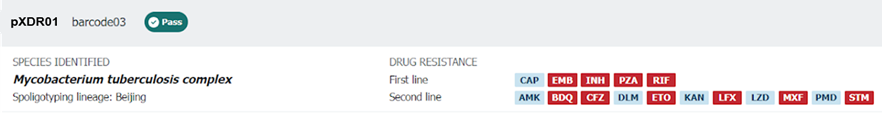
**

**
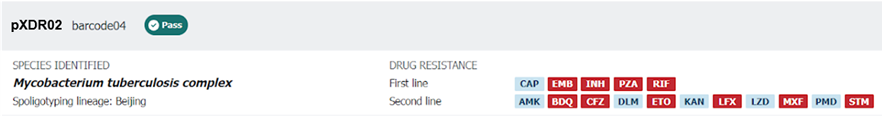
**

**
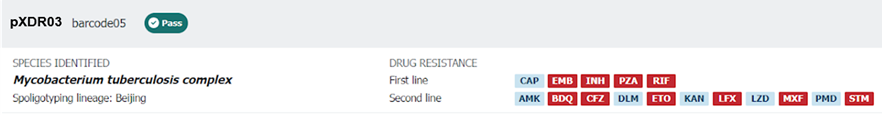
**

**
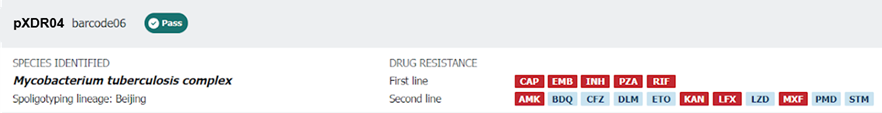
**

**PS**

**
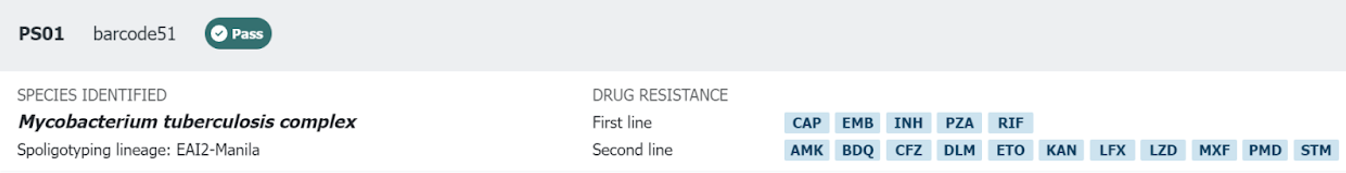
**

**
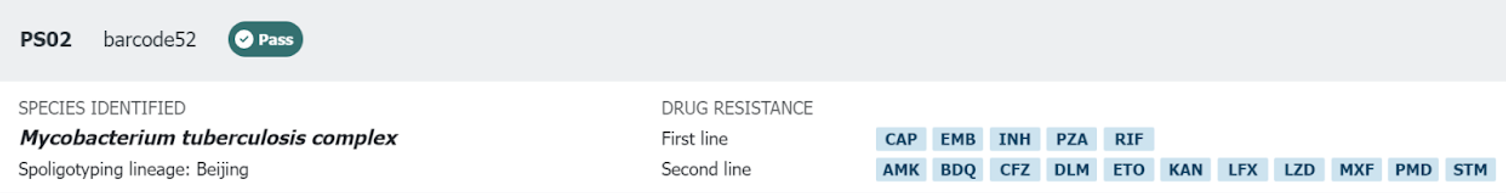
**

**
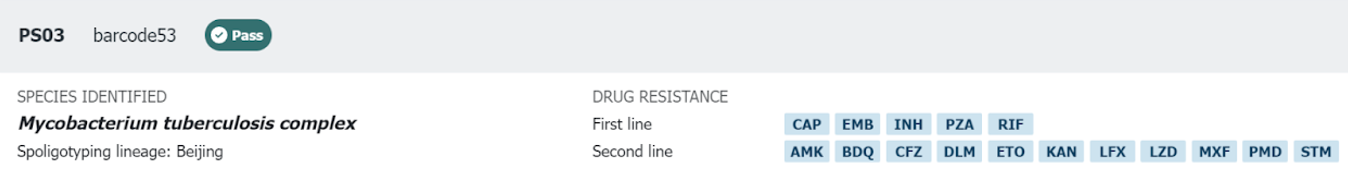
**

**
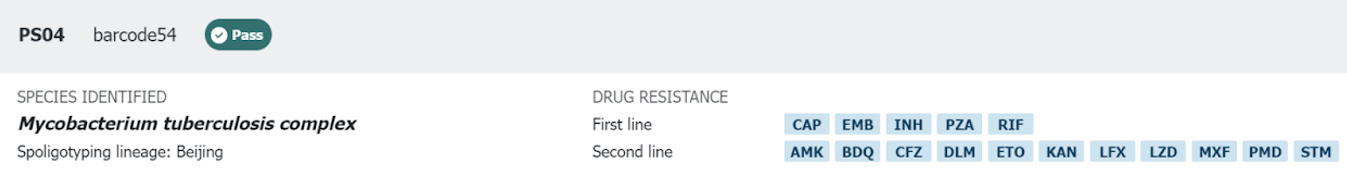
**

**
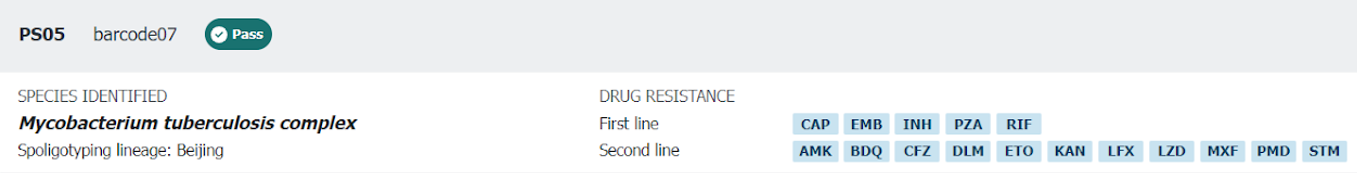
**

**
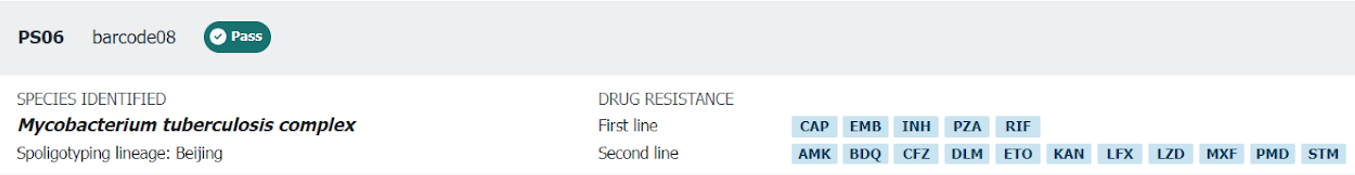
**

**
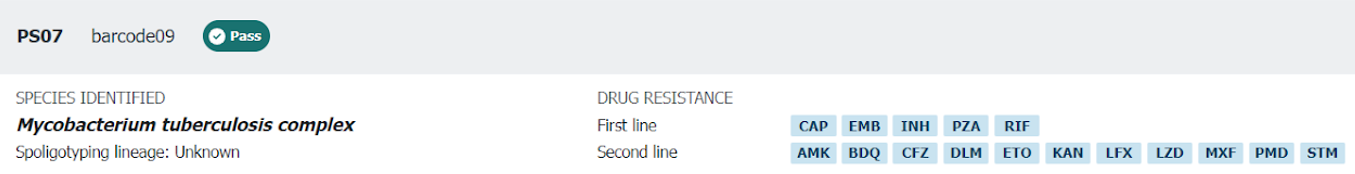
**

**
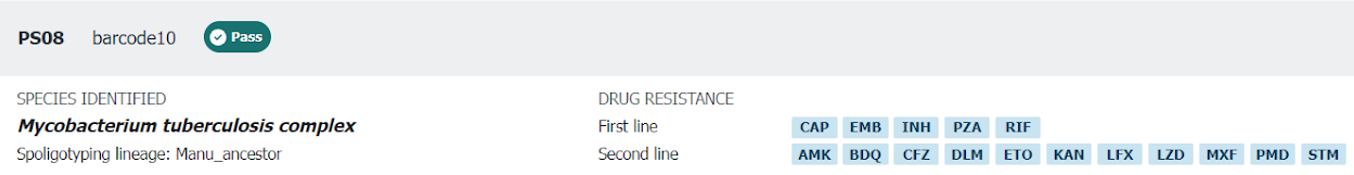
**

**
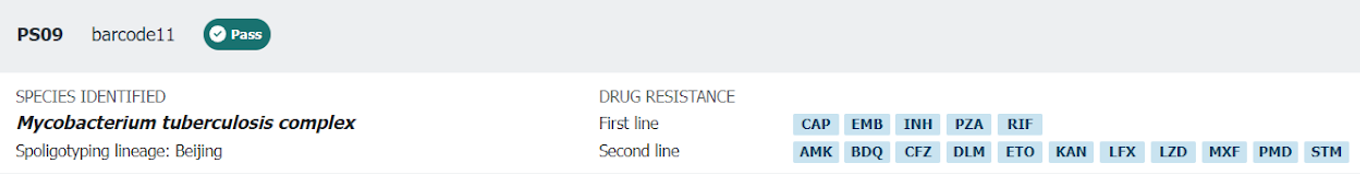
**

**
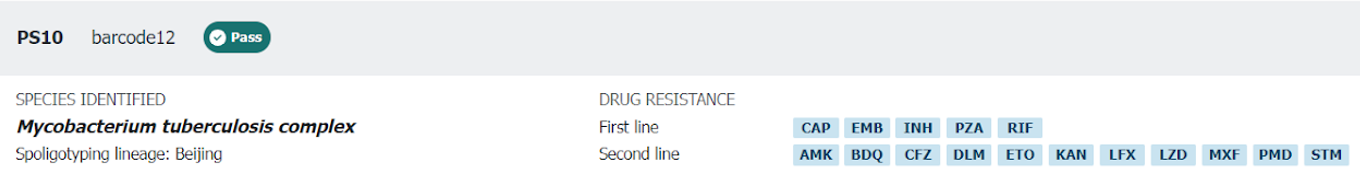
**

**
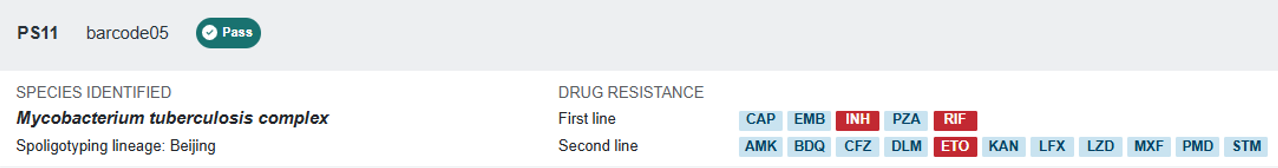
**

**
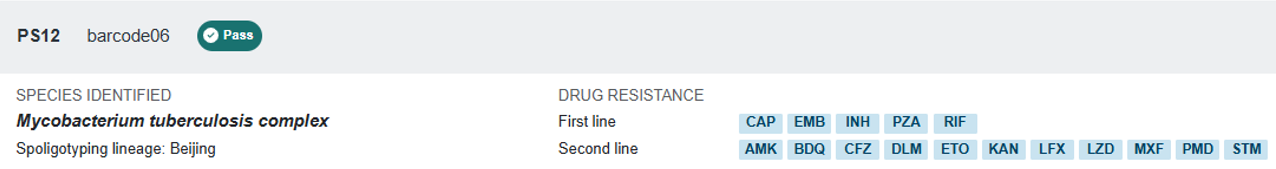
**

**
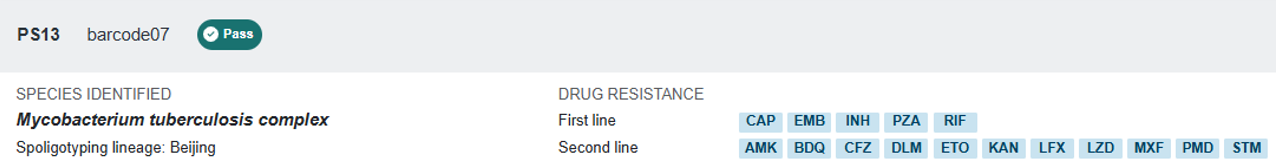
**

**
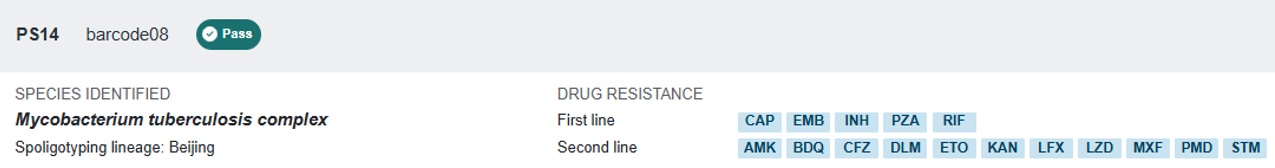
**

**
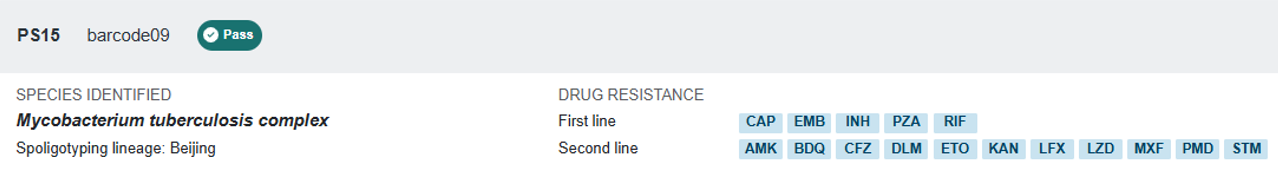
**

**
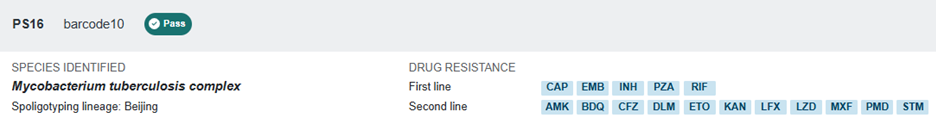
**

**
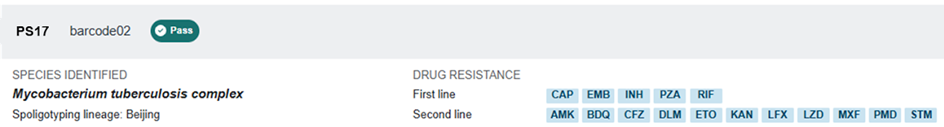
**

**Abbreviations:** PS, pan-susceptible; IR, isoniazid-resistant; RR, rifampicin-resistant; IRR, isoniazid- and rifampicin-resistant; MDR, multidrug-resistant; pre-XDR, pre-extensively drug-resistant; SPT, sputum sample; CLN, colony sample.
